# Supplementary material for: Curcumin Supplementation and Human Disease: A Scoping Review of Clinical Trials
Source: MDPI journal article supplement (doi:10.3390/ijms24054476), 2023-02-24
Supplement: s1 [file s1]

**Supplemental Figure S1: Curcumin Clinical Trial Database Search Strategies**

All searches were conducted on May 28, 2019 and updated on December 20-21, 2020.

Searches were customized for each database to include appropriate keywords and controlled vocabulary terms related to the use of curcuminoids in the treatment of medical conditions in humans. An English language filter was applied.

**Ovid/MEDLINE**

| #  | Searches                    |
|----|-----------------------------|
| 1  | exp Curcumin/               |
| 2  | exp Curcuma/                |
| 3  | "c.longa".ab,kw,ti.         |
| 4  | "curcum*".ab,kw,ti.         |
| 5  | Diferuloylmethane.ab,kw,ti. |
| 6  | "Nanocurc*".ab,kw,ti.       |
| 7  | turmeric*.ab,kw,ti.         |
| 8  | tumeric*.ab,kw,ti.          |
| 9  | Halada.ab,kw,ti.            |
| 10 | Haladi.ab,kw,ti.            |
| 11 | Haridra.ab,kw,ti.           |
| 12 | "Indian Saffron".ab,kw,ti.  |
| 13 | Nisha.ab,kw,ti.             |

|    |                                 |
|----|---------------------------------|
| 14 | "Jiang Huang".ab,kw,ti.         |
| 15 | Rajani.ab,kw,ti.                |
| 16 | Safran Bourbon.ab,kw,ti.        |
| 17 | Safran de Batallita.ab,kw,ti.   |
| 18 | Safran de Indes.ab,kw,ti.       |
| 19 | "Yu Jin".ab,kw,ti.              |
| 20 | or/1-19                         |
| 21 | exp controlled clinical trial/  |
| 22 | randomized controlled trial.pt. |
| 23 | controlled clinical trial.pt.   |
| 24 | "allocat*".ab,kw,ti.            |
| 25 | "blind*".ab,kw,ti.              |
| 26 | crossover.ab,kw,ti.             |
| 27 | "intervention*".ab,kw,ti.       |
| 28 | "placebo*".ab,kw,ti.            |
| 29 | "pre post".ab,kw,ti.            |
| 30 | prospective.ab,kw,ti.           |
| 31 | "test retest".ab,kw,ti.         |
| 32 | "trial*".ab,kw,ti.              |
| 33 | random*.ab,kw,ti.               |
| 34 | or/21-33                        |
| 35 | 20 and 34                       |

|    |                              |
|----|------------------------------|
| 36 | exp animals/ not exp Humans/ |
| 37 | 35 not 36                    |
| 38 | limit 37 to english language |

## Cochrane Library

| ID  | Search                                        |
|-----|-----------------------------------------------|
| #1  | MeSH descriptor: [Curcumin] explode all trees |
| #2  | MeSH descriptor: [Curcuma] explode all trees  |
| #3  | curcum*:ti,ab,kw                              |
| #4  | Diferuloylmethane:ti,ab,kw                    |
| #5  | c.longa:ti,ab,kw                              |
| #6  | Nanocurc*:ti,ab,kw                            |
| #7  | turmeric*:ti,ab,kw                            |
| #8  | tumeric*:ti,ab,kw                             |
| #9  | halada:ti,ab,kw                               |
| #10 | Haldi:ti,ab,kw                                |
| #11 | Haridra:ti,ab,kw                              |
| #12 | "Indian Saffron":ti,ab,kw                     |
| #13 | nisha:ti,ab,kw                                |
| #14 | "Jiang Huang":ab,kw,ti                        |
| #15 | Rajani:ti,ab,kw                               |
| #16 | Safran Bourbon:ti,ab,kw                       |
| #17 | Safran de Batallita:ti,ab,kw                  |
| #18 | Safran de Indes:ti,ab,kw                      |
| #19 | "Yu Jin":ti,ab,kw                             |
| #20 | {or #1-#19}                                   |
| #21 | MeSH descriptor: [Animals] explode all trees  |
| #22 | MeSH descriptor: [Humans] explode all trees   |
| #23 | #21 NOT #22                                   |
| #24 | #20 NOT #23                                   |
| #25 | #24 in Trials                                 |

## Embase

| No. | Query          |
|-----|----------------|
| 1   | 'curcumin'/exp |
| 2   | 'turmeric'/exp |
| 3   | 'curcuma'/exp  |

|    |                                                                                                                                                                                                                                                                                                                                                                                                               |
|----|---------------------------------------------------------------------------------------------------------------------------------------------------------------------------------------------------------------------------------------------------------------------------------------------------------------------------------------------------------------------------------------------------------------|
| 4  | #1 OR #2 OR #3                                                                                                                                                                                                                                                                                                                                                                                                |
| 5  | curcum*:ti,ab,kw                                                                                                                                                                                                                                                                                                                                                                                              |
| 6  | diferuloylmethane:ti,ab,kw                                                                                                                                                                                                                                                                                                                                                                                    |
| 7  | c.longa:ti,ab,kw                                                                                                                                                                                                                                                                                                                                                                                              |
| 8  | nanocurc*:ti,ab,kw                                                                                                                                                                                                                                                                                                                                                                                            |
| 9  | turmeric*:ti,ab,kw                                                                                                                                                                                                                                                                                                                                                                                            |
| 10 | tumeric*:ti,ab,kw                                                                                                                                                                                                                                                                                                                                                                                             |
| 11 | halada:ti,ab,kw                                                                                                                                                                                                                                                                                                                                                                                               |
| 12 | haldi:ti,ab,kw                                                                                                                                                                                                                                                                                                                                                                                                |
| 13 | haridra:ti,ab,kw                                                                                                                                                                                                                                                                                                                                                                                              |
| 14 | 'indian saffron':ti,ab,kw                                                                                                                                                                                                                                                                                                                                                                                     |
| 15 | nisha:ti,ab,kw                                                                                                                                                                                                                                                                                                                                                                                                |
| 16 | 'jiang huang':ab,kw,ti                                                                                                                                                                                                                                                                                                                                                                                        |
| 17 | rajani:ti,ab,kw                                                                                                                                                                                                                                                                                                                                                                                               |
| 18 | 'safran bourbon':ti,ab,kw                                                                                                                                                                                                                                                                                                                                                                                     |
| 19 | 'safran de indes':ti,ab,kw                                                                                                                                                                                                                                                                                                                                                                                    |
| 20 | 'yu jin':ti,ab,kw                                                                                                                                                                                                                                                                                                                                                                                             |
| 21 | #5 OR #6 OR #7 OR #8 OR #9 OR #10 OR #11 OR #12 OR #13 OR #14<br>OR #15 OR #16 OR #17 OR #18 OR #19 OR #20                                                                                                                                                                                                                                                                                                    |
| 22 | #4 OR #21                                                                                                                                                                                                                                                                                                                                                                                                     |
| 23 | 'animal'/exp                                                                                                                                                                                                                                                                                                                                                                                                  |
| 24 | 'human'/exp                                                                                                                                                                                                                                                                                                                                                                                                   |
| 25 | #23 NOT #24                                                                                                                                                                                                                                                                                                                                                                                                   |
| 26 | 'crossover procedure':de OR 'double-blind procedure':de OR<br>'randomized controlled trial':de OR 'single-blind procedure':de OR<br>random*:de,ab,ti OR factorial*:de,ab,ti OR crossover*:de,ab,ti OR<br>((cross NEXT/1 over*):de,ab,ti) OR placebo*:de,ab,ti OR ((doubl*<br>NEAR/1 blind*):de,ab,ti) OR ((singl* NEAR/1 blind*):de,ab,ti) OR<br>assign*:de,ab,ti OR allocat*:de,ab,ti OR volunteer*:de,ab,ti |

|    |                               |
|----|-------------------------------|
| 27 | #22 AND #26                   |
| 28 | #27 NOT #25                   |
| 29 | #27 NOT #25 AND [english]/lim |

## Web of Science

|      |                                                                                                                                                                                            |
|------|--------------------------------------------------------------------------------------------------------------------------------------------------------------------------------------------|
| # 17 | (#16) AND <b>LANGUAGE:</b> (English)<br><i>Indexes=SCI-EXPANDED, SSCI, A&amp;HCI, CPCI-S, CPCI-SSH, BKCI-S, BKCI-SSH, CCR-EXPANDED, IC Timespan=1900-2019</i>                              |
| # 16 | #14 NOT #15<br><i>Indexes=SCI-EXPANDED, SSCI, A&amp;HCI, CPCI-S, CPCI-SSH, BKCI-S, BKCI-SSH, CCR-EXPANDED, IC Timespan=1900-2019</i>                                                       |
| # 15 | TS=(animal* NOT human*)<br><i>Indexes=SCI-EXPANDED, SSCI, A&amp;HCI, CPCI-S, CPCI-SSH, BKCI-S, BKCI-SSH, CCR-EXPANDED, IC Timespan=1900-2019</i>                                           |
| # 14 | #13 AND #1<br><i>Indexes=SCI-EXPANDED, SSCI, A&amp;HCI, CPCI-S, CPCI-SSH, BKCI-S, BKCI-SSH, CCR-EXPANDED, IC Timespan=1900-2019</i>                                                        |
| # 13 | #12 OR #11 OR #10 OR #9 OR #8 OR #7 OR #6 OR #5 OR #4 OR #3 OR #2<br><i>Indexes=SCI-EXPANDED, SSCI, A&amp;HCI, CPCI-S, CPCI-SSH, BKCI-S, BKCI-SSH, CCR-EXPANDED, IC Timespan=1900-2019</i> |
| # 12 | TS=trial*<br><i>Indexes=SCI-EXPANDED, SSCI, A&amp;HCI, CPCI-S, CPCI-SSH, BKCI-S, BKCI-SSH, CCR-EXPANDED, IC Timespan=1900-2019</i>                                                         |
| # 11 | TS="test retest"<br><i>Indexes=SCI-EXPANDED, SSCI, A&amp;HCI, CPCI-S, CPCI-SSH, BKCI-S, BKCI-SSH, CCR-EXPANDED, IC Timespan=1900-2019</i>                                                  |
| # 10 | TS=RCT<br><i>Indexes=SCI-EXPANDED, SSCI, A&amp;HCI, CPCI-S, CPCI-SSH, BKCI-S, BKCI-SSH, CCR-EXPANDED, IC Timespan=1900-2019</i>                                                            |
| # 9  | TS=random*                                                                                                                                                                                 |

|     |                                                                                                                                                                                                                                                                                                                                                        |
|-----|--------------------------------------------------------------------------------------------------------------------------------------------------------------------------------------------------------------------------------------------------------------------------------------------------------------------------------------------------------|
|     | <i>Indexes=SCI-EXPANDED, SSCI, A&amp;HCI, CPCI-S, CPCI-SSH, BKCI-S, BKCI-SSH, CCR-EXPANDED, IC Timespan=1900-2019</i>                                                                                                                                                                                                                                  |
| # 8 | TS=prospective<br><i>Indexes=SCI-EXPANDED, SSCI, A&amp;HCI, CPCI-S, CPCI-SSH, BKCI-S, BKCI-SSH, CCR-EXPANDED, IC Timespan=1900-2019</i>                                                                                                                                                                                                                |
| # 7 | TS="pre post"<br><i>Indexes=SCI-EXPANDED, SSCI, A&amp;HCI, CPCI-S, CPCI-SSH, BKCI-S, BKCI-SSH, CCR-EXPANDED, IC Timespan=1900-2019</i>                                                                                                                                                                                                                 |
| # 6 | TS=placebo*<br><i>Indexes=SCI-EXPANDED, SSCI, A&amp;HCI, CPCI-S, CPCI-SSH, BKCI-S, BKCI-SSH, CCR-EXPANDED, IC Timespan=1900-2019</i>                                                                                                                                                                                                                   |
| # 5 | TS=intervention*<br><i>Indexes=SCI-EXPANDED, SSCI, A&amp;HCI, CPCI-S, CPCI-SSH, BKCI-S, BKCI-SSH, CCR-EXPANDED, IC Timespan=1900-2019</i>                                                                                                                                                                                                              |
| # 4 | TS=crossover<br><i>Indexes=SCI-EXPANDED, SSCI, A&amp;HCI, CPCI-S, CPCI-SSH, BKCI-S, BKCI-SSH, CCR-EXPANDED, IC Timespan=1900-2019</i>                                                                                                                                                                                                                  |
| # 3 | TS=blind*<br><i>Indexes=SCI-EXPANDED, SSCI, A&amp;HCI, CPCI-S, CPCI-SSH, BKCI-S, BKCI-SSH, CCR-EXPANDED, IC Timespan=1900-2019</i>                                                                                                                                                                                                                     |
| # 2 | TS=allocat*<br><i>Indexes=SCI-EXPANDED, SSCI, A&amp;HCI, CPCI-S, CPCI-SSH, BKCI-S, BKCI-SSH, CCR-EXPANDED, IC Timespan=1900-2019</i>                                                                                                                                                                                                                   |
| # 1 | TS=(curcum* OR diferuloylmethane OR c.longa OR nanocurc* OR turmeric* OR tumeric* OR halada OR haldi OR haridra OR "indian saffron" OR nisha OR "jiang huang" OR rajani OR "safran bourbon" OR "safran de indes" OR "yu jin")<br><i>Indexes=SCI-EXPANDED, SSCI, A&amp;HCI, CPCI-S, CPCI-SSH, BKCI-S, BKCI-SSH, CCR-EXPANDED, IC Timespan=1900-2019</i> |

## AMED

|  |          |
|--|----------|
|  | Searches |
|--|----------|

|    |                            |
|----|----------------------------|
| 1  | exp Curcuma/               |
| 2  | "curcum*".ti,ab.           |
| 3  | "c.longa".ti,ab.           |
| 4  | diferuloylmethane.ti,ab.   |
| 5  | "nanocurc*".ti,ab.         |
| 6  | "turmeric*".ti,ab.         |
| 7  | "tumeric*".ti,ab.          |
| 8  | halada.ti,ab.              |
| 9  | haldi.ti,ab.               |
| 10 | Haridra.ti,ab.             |
| 11 | "Indian Saffron".ti,ab.    |
| 12 | Nisha.ti,ab.               |
| 13 | "Jiang Huang".ti,ab.       |
| 14 | rajani.ti,ab.              |
| 15 | Safran Bourbon.ti,ab.      |
| 16 | Safran de Batallita.ti,ab. |
| 17 | Safran de Indes.ti,ab.     |
| 18 | "Yu Jin".ti,ab.            |

|    |                                                                                                                           |
|----|---------------------------------------------------------------------------------------------------------------------------|
| 19 | or/1-18                                                                                                                   |
| 20 | exp clinical trials/ or randomized controlled trials/ or comparative study/ or double blind method/ or random allocation/ |
| 21 | "random*".ti,ab.                                                                                                          |
| 22 | "trial*".ti,ab.                                                                                                           |
| 23 | "test retest".ti,ab.                                                                                                      |
| 24 | prospective.ti,ab.                                                                                                        |
| 25 | "pre post".ti,ab.                                                                                                         |
| 26 | "placebo*".ti,ab.                                                                                                         |
| 27 | "intervention*".ti,ab.                                                                                                    |
| 28 | crossover.ti,ab.                                                                                                          |
| 29 | "blind*".ti,ab.                                                                                                           |
| 30 | "allocat*".ti,ab.                                                                                                         |
| 31 | RCT.ti,ab.                                                                                                                |
| 32 | or/20-31                                                                                                                  |
| 33 | 19 and 32                                                                                                                 |
| 34 | exp Animals/                                                                                                              |



|    |             |
|----|-------------|
| 35 | exp humans/ |
| 36 | 34 not 35   |
| 37 | 33 not 36   |

## CINAHL

| #   | Query                                                                                                                                                                                                                           |
|-----|---------------------------------------------------------------------------------------------------------------------------------------------------------------------------------------------------------------------------------|
| S25 | ( S18 AND S22 ) NOT S19<br>Limiters - Language: English                                                                                                                                                                         |
| S24 | ( S18 AND S22 ) NOT S19                                                                                                                                                                                                         |
| S23 | S18 AND S22                                                                                                                                                                                                                     |
| S22 | S20 OR S21                                                                                                                                                                                                                      |
| S21 | (MH "Clinical Trials+") OR (MH "Controlled Before-After Studies")<br>OR (MH "Pretest-Posttest Design+")                                                                                                                         |
| S20 | placebo* OR random* OR "comparative stud*" OR clinical NEAR/3<br>trial* OR research NEAR/3 design OR evaluat* NEAR/3 stud* OR<br>prospectiv* NEAR/3 stud* OR (singl* OR doubl* OR trebl* OR<br>tripl*) NEAR/3 (blind* OR mask*) |
| S19 | animal* NOT human*                                                                                                                                                                                                              |
| S18 | (S1 OR S2 OR S3 OR S4 OR S5 OR S6 OR S7 OR S8 OR S9 OR S10 OR<br>S11 OR S12 OR S13 OR S14 OR S15 OR S16 OR S17)                                                                                                                 |
| S17 | TI "Yu Jin" OR AB "Yu Jin"                                                                                                                                                                                                      |
| S16 | TI Safran de Indes OR AB Safran de Indes                                                                                                                                                                                        |
| S15 | TI Safran de Batallita OR AB Safran de Batallita                                                                                                                                                                                |
| S14 | TI Safran Bourbon OR AB Safran Bourbon                                                                                                                                                                                          |
| S13 | TI rajani OR AB rajani                                                                                                                                                                                                          |
| S12 | TI "Jiang Huang" OR AB "Jiang Huang"                                                                                                                                                                                            |

|     |                                              |
|-----|----------------------------------------------|
| S11 | TI Nisha OR AB Nisha                         |
| S10 | TI "Indian Saffron" OR AB "Indian Saffron"   |
| S9  | TI Haridra OR AB Haridra                     |
| S8  | TI haldi OR AB haldi                         |
| S7  | TI halada OR AB halada                       |
| S6  | TI tumeric* OR AB tumeric*                   |
| S5  | TI turmeric* OR AB turmeric*                 |
| S4  | TI nanocurc* OR AB nanocurc*                 |
| S3  | TI diferuloylmethane OR AB diferuloylmethane |
| S2  | TI c.longa OR AB c.longa                     |
| S1  | TI curcum* OR AB curcum*                     |

## PsycInfo

| #   | Query                                                                                                         |
|-----|---------------------------------------------------------------------------------------------------------------|
| S22 | S20 NOT S21                                                                                                   |
| S21 | animal* NOT human*                                                                                            |
| S20 | S1 AND S19                                                                                                    |
| S19 | (S2 OR S3 OR S4 OR S5 OR S6 OR S7 OR S8 OR S9 OR S10 OR S11 OR S12 OR S13 OR S14 OR S15 OR S16 OR S17 OR S18) |
| S18 | TI "Yu Jin" OR AB "Yu Jin"                                                                                    |
| S17 | TI Safran de Indes OR AB Safran de Indes                                                                      |
| S16 | TI Safran de Batallita OR AB Safran de Batallita                                                              |
| S15 | TI Safran Bourbon OR AB Safran Bourbon                                                                        |
| S14 | TI rajani OR AB rajani                                                                                        |

|     |                                                                                                                                                                                                                                                                                                                                                                                             |
|-----|---------------------------------------------------------------------------------------------------------------------------------------------------------------------------------------------------------------------------------------------------------------------------------------------------------------------------------------------------------------------------------------------|
| S13 | TI "Jiang Huang" OR AB "Jiang Huang"                                                                                                                                                                                                                                                                                                                                                        |
| S12 | TI Nisha OR AB Nisha                                                                                                                                                                                                                                                                                                                                                                        |
| S11 | TI "Indian Saffron" OR AB "Indian Saffron"                                                                                                                                                                                                                                                                                                                                                  |
| S10 | TI Haridra OR AB Haridra                                                                                                                                                                                                                                                                                                                                                                    |
| S9  | TI haldi OR AB haldi                                                                                                                                                                                                                                                                                                                                                                        |
| S8  | TI halada OR AB halada                                                                                                                                                                                                                                                                                                                                                                      |
| S7  | TI tumeric* OR AB tumeric*                                                                                                                                                                                                                                                                                                                                                                  |
| S6  | TI turmeric* OR AB turmeric*                                                                                                                                                                                                                                                                                                                                                                |
| S5  | TI nanocurc* OR AB nanocurc*                                                                                                                                                                                                                                                                                                                                                                |
| S4  | TI diferuloylmethane OR AB diferuloylmethane                                                                                                                                                                                                                                                                                                                                                |
| S3  | TI c.longa OR AB c.longa                                                                                                                                                                                                                                                                                                                                                                    |
| S2  | TI curcum* OR AB curcum*                                                                                                                                                                                                                                                                                                                                                                    |
| S1  | SU.EXACT("Treatment Effectiveness Evaluation") OR<br>SU.EXACT.EXPLODE("Treatment Outcomes") OR<br>SU.EXACT("Placebo") OR SU.EXACT("Followup Studies") OR<br>placebo* OR random* OR "comparative stud*" OR clinical NEAR/3<br>trial* OR research NEAR/3 design OR evaluat* NEAR/3 stud* OR<br>prospectiv* NEAR/3 stud* OR (singl* OR doubl* OR trebl* OR<br>tripl*) NEAR/3 (blind* OR mask*) |

[ClinicalTrials.gov](https://clinicaltrials.gov)

**curcumin OR turmeric | Studies With Results**
